# Supplementary material for: Prediction consistency and clinical presentations of breast cancer molecular subtypes for Han Chinese population
Source: PubMed Central journal article supplement (PMC3445863; doi:10.1186/1479-5876-10-s1-s10), 2012-09-19
Supplement: 1479-5876-10-S1-S10-S3.pdf [file 1479-5876-10-S1-S10-S3.pdf]

| Hu 306 with gene-centring |         |                   |           |            |               |                    |              |
|---------------------------|---------|-------------------|-----------|------------|---------------|--------------------|--------------|
| IHC subtype               | #number | Intrinsic subtype |           |            |               |                    |              |
|                           |         | Luminal A         | Luminal B | Basal-like | Her2-enriched | Normal breast-like | Unclassified |
| Luminal A(ER+/HER2-)      | 73      | <b>55</b>         | 16        |            |               | 2                  |              |
| Luminal B(ER+/HER2+)      | 23      | 3                 | <b>13</b> |            | 6             |                    | 1            |
| Basal-like(ER-/HER2-)     | 45      |                   | 2         | <b>38</b>  | 3             | 2                  |              |
| HER2-enriched(ER-/HER2+)  | 28      |                   | 1         | 3          | <b>20</b>     | 4                  |              |

| Hu 306 with DWD          |         |                   |           |            |               |                    |              |
|--------------------------|---------|-------------------|-----------|------------|---------------|--------------------|--------------|
| IHC subtype              | #number | Intrinsic subtype |           |            |               |                    |              |
|                          |         | Luminal A         | Luminal B | Basal-like | Her2-enriched | Normal breast-like | Unclassified |
| Luminal A(ER+/HER2-)     | 73      | <b>53</b>         | 18        |            |               | 2                  |              |
| Luminal B(ER+/HER2+)     | 23      | 4                 | <b>14</b> |            | 4             |                    | 1            |
| Basal-like(ER-/HER2-)    | 45      |                   | 2         | <b>38</b>  | 3             | 2                  |              |
| HER2-enriched(ER-/HER2+) | 28      |                   | 1         | 3          | <b>18</b>     | 6                  |              |

| PAM50 with gene-centring |         |                   |           |            |               |                    |              |
|--------------------------|---------|-------------------|-----------|------------|---------------|--------------------|--------------|
| IHC subtype              | #number | Intrinsic subtype |           |            |               |                    |              |
|                          |         | Luminal A         | Luminal B | Basal-like | Her2-enriched | Normal breast-like | Unclassified |
| Luminal A(ER+/HER2-)     | 73      | <b>51</b>         | 20        |            |               | 2                  |              |
| Luminal B(ER+/HER2+)     | 23      | 3                 | <b>14</b> |            | 6             |                    |              |
| Basal-like(ER-/HER2-)    | 45      |                   | 2         | <b>37</b>  | 4             |                    | 2            |
| HER2-enriched(ER-/HER2+) | 28      | 2                 |           | 4          | <b>20</b>     |                    | 2            |

| PAM50 with DWD           |         |                   |           |            |               |                    |              |
|--------------------------|---------|-------------------|-----------|------------|---------------|--------------------|--------------|
| IHC subtype              | #number | Intrinsic subtype |           |            |               |                    |              |
|                          |         | Luminal A         | Luminal B | Basal-like | Her2-enriched | Normal breast-like | Unclassified |
| Luminal A(ER+/HER2-)     | 73      | <b>43</b>         | 11        |            |               | 19                 |              |
| Luminal B(ER+/HER2+)     | 23      | 6                 | <b>6</b>  |            | 11            |                    |              |
| Basal-like(ER-/HER2-)    | 45      | 1                 | 1         | <b>37</b>  | 4             |                    | 2            |
| HER2-enriched(ER-/HER2+) | 28      | 1                 | 1         | 4          | <b>16</b>     |                    | 6            |
